# Supplementary material for: Carbon source availability drives nutrient utilization in CD8+ T cells
Source: PubMed Central journal article supplement — Cell Metab. Author manuscript; Available in PMC 2023 Apr 3. (PMC10068808; doi:10.1016/j.cmet.2022.07.012), 2022-08-17
Supplement: NIHMS1882382-supplement-Supplemental_Info.pdf [file NIHMS1882382-supplement-Supplemental_Info.pdf]

**Supplemental information**

**Carbon source availability drives  
nutrient utilization in CD8<sup>+</sup> T cells**

**Irem Kaymak, Katarzyna M. Luda, Lauren R. Duimstra, Eric H. Ma, Joseph Longo, Michael S. Dahabieh, Brandon Faubert, Brandon M. Oswald, McLane J. Watson, Susan M. Kitchen-Goosen, Lisa M. DeCamp, Shelby E. Compton, Zhen Fu, Ralph J. DeBerardinis, Kelsey S. Williams, Ryan D. Sheldon, and Russell G. Jones**

## **Supplemental Information**

### **Carbon source availability drives nutrient utilization in CD8<sup>+</sup> T cells**

Irem Kaymak, Katarzyna M. Luda, Lauren R. Duimstra, Eric H. Ma, Joseph Longo, Michael S. Dahabieh, Brandon Faubert, Brandon M. Oswald, McLane J. Watson, Susan M. Kitchen-Goosen, Lisa M. DeCamp, Shelby E. Compton, Zhen Fu, Ralph J. DeBerardinis, Kelsey S. Williams, Ryan D. Sheldon, and Russell G. Jones

## **Inventory of Supplemental Information**

### **Supplemental Tables**

**Table S1**, related to Figure 1. Summary of metabolite concentrations in medium formulations and mouse and human plasma.

### **Supplemental Figures**

**Figure S1**, Related to Figure 1. Impact of PCS on CD8<sup>+</sup> T cell intracellular metabolite abundance and extracellular nutrient levels.

**Figure S2**, Related to Figure 2. Impact of media formulations and PCS on CD8<sup>+</sup> T cell mRNA expression.

**Figure S3**, Related to Figure 3. Contribution of extracellular citrate, pyruvate, and alanine to TCA cycle metabolism in CD8<sup>+</sup> T cells.

**Figure S4**, Related to Figure 4. Physiologic carbon sources influence T cell survival and effector function.

**Figure S5**, Related to Figure 5. Impact of exogenous lactate on CD8<sup>+</sup> T cell proliferation, IFN- $\gamma$  production, and metabolism.

**Figure S6**, Related to Figure 6. Validation of Ldha silencing in CD8<sup>+</sup> T cells.

**Table S1, related to Figure 1. Summary of metabolite concentrations in medium formulations and mouse and human plasma.**

|                                  | IMDM  | VIM  | RPMI  | PCS  | Mouse plasma <sup>1,2</sup> | Mouse plasma <sup>3</sup> | Human Plasma <sup>3</sup> |
|----------------------------------|-------|------|-------|------|-----------------------------|---------------------------|---------------------------|
| D-Glucose                        | 25000 | 5000 | 11111 |      | 8333±1966                   | 4380±90                   | 4817±421                  |
| L-Alanine                        | 280   | 200  | -     |      | 196±16                      | 690±112                   | 448±127                   |
| L-Arginine                       | 400   | 400  | 1149  |      | 93±4                        | 66±13                     | 109±46                    |
| L-Asparagine                     | 190   | 190  | 378   |      | 36±2                        | 50±12                     | 48±18                     |
| L-Aspartic acid                  | 230   | 10   | 150   |      | 13±2                        | 7.0±0.6                   | 21±1                      |
| L-Cystine 2HCl                   | 290   | 290  | 208   |      | 26±4                        | 30±2                      | 101±22                    |
| L-Glutamic acid                  | 510   | 20   | 136   |      | 25±1                        | 19±2                      | 68±46                     |
| L-Glutamine                      | 6000* | 500  | 6055* |      | 397±10                      | 934±107                   | 550±62                    |
| Glycine                          | 400   | 100  | 133   |      | 120±4                       | 217 ± 40                  | 266±50                    |
| L-Histidine HCl•H <sub>2</sub> O | 200   | 200  | 97    |      | 50±3                        | 76±12                     | 106±29                    |
| L-Isoleucine                     | 800   | 800  | 382   |      | 73±1                        | 138±9                     | 69±13                     |
| L-Leucine                        | 800   | 800  | 382   |      | 124±21                      | 270±23                    | 158±58                    |
| L-Lysine HCl                     | 800   | 800  | 219   |      | 309±26                      | 176±28                    | 236±111                   |
| L-Methionine                     | 200   | 40   | 101   |      | 52±1                        | 53±5                      | 29±3                      |
| L-Phenylalanine                  | 400   | 400  | 91    |      | 54±3                        | 96±24                     | 79±40                     |
| L-Proline                        | 350   | 350  | 174   |      | 67±1                        | 71±13                     | 190±30                    |
| L-Serine                         | 400   | 100  | 286   |      | 82±2                        | 96±24                     | 141±46                    |
| L-Threonine                      | 800   | 100  | 168   |      | 126±1                       | 145±15                    | 155±55                    |
| L-Tryptophan                     | 800   | 80   | 25    |      | 46±1                        | 62±4                      | 54±14                     |
| L-Tyrosine                       | 460   | 460  | 111   |      | 47±3                        | 69±19                     | 89±42                     |
| L-Valine                         | 800   | 800  | 171   |      | 178±19                      | 262±14                    | 235±25                    |
| L-Hydroxyproline                 | -     | -    | 150   |      | 20±3                        | 3.1±0.5                   | 15±4                      |
|                                  |       |      |       |      |                             |                           |                           |
| Acetate                          |       |      |       | 400  | 433±115                     | -                         | 36±8                      |
| bHB                              |       |      |       | 850  | 302±108                     | 849 ± 126                 | 53±28                     |
| Citrate                          |       |      |       | 215  | 345±56                      | 214±7                     | 131±53                    |
| Lactate                          |       |      |       | 3000 | 2515±218                    | 3088 ± 431                | 1640±776                  |
| Pyruvate                         |       |      |       | 150  | 108±14                      | 150±25                    | 61±11                     |

Shown is a summary of major metabolite concentrations in synthetic medium (IMDM, VIM) and physiologic carbon sources (PCS) used in this study. RPMI is included for

comparison. Corresponding metabolite concentrations in mouse plasma<sup>1-3</sup> and human plasma<sup>3</sup> are shown for comparison. Metabolites not included in medium formulations are indicated by (-). All concentrations are listed in  $\mu\text{M}$ .

\*IMDM and RPMI medium formulations contain 2000 and 2055  $\mu\text{M}$  glutamine, respectively, but are supplemented with 4000  $\mu\text{M}$  glutamine. Glutamine concentrations in final medium formulations are listed.

<sup>1</sup>Sugimoto *et al.*, *Nucleic Acids Research*, 2012; <sup>2</sup>Hui *et al.*, *Nature*, 2017; <sup>3</sup>Cantor *et al.*, *Cell*, 2017.

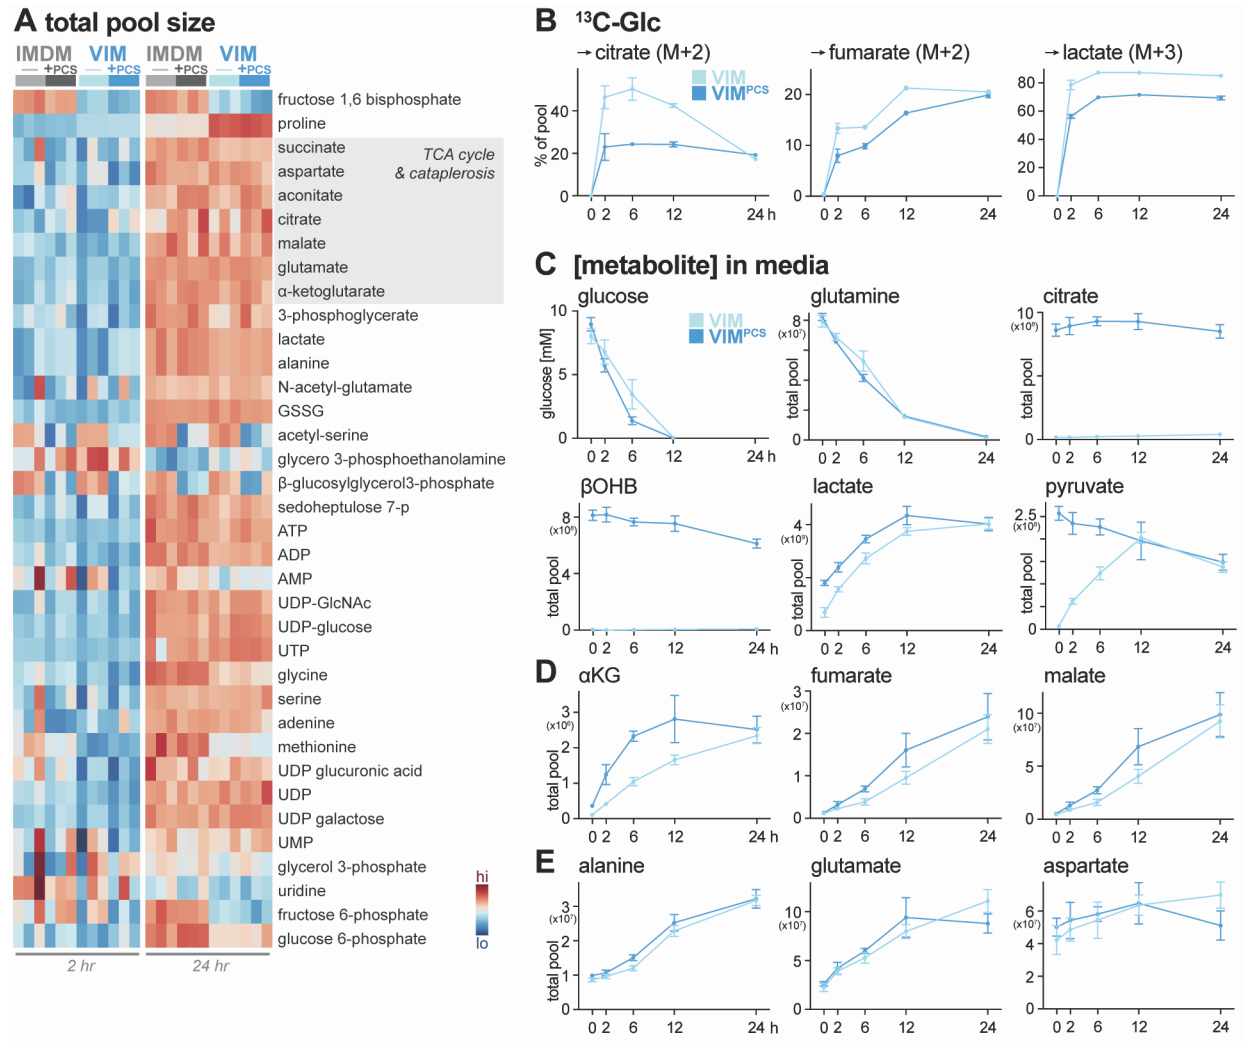

**Figure S1, Related to Figure 1. Impact of PCS on CD8<sup>+</sup> T cell intracellular metabolite abundance and extracellular nutrient levels.**

**A**, Heatmap depicting relative pool size of intracellular metabolites from CD8<sup>+</sup> T cells cultured in IMDM or VIM with (+) or without (-) PCS from **Figure 1B**. Activated CD8<sup>+</sup> T cells were cultured in the indicated medium (containing [U-<sup>13</sup>C]-glucose) for 2 h or 24 h prior to metabolite extraction (mean±SEM, n=3/sample). **B**, Line graphs depicting fractional enrichment of intracellular <sup>13</sup>C-glucose-derived citrate M+2, fumarate M+2, and lactate M+3 in activated CD8<sup>+</sup> T cells over time. Activated CD8<sup>+</sup> T cells were cultured in VIM (±PCS) containing [U-<sup>13</sup>C]-glucose for up to 24 h, with intracellular

metabolites extracted at the indicated time points (mean $\pm$ SEM, n=3/sample). **C–E**, Line graphs depicting extracellular metabolite levels in culture medium over time. Activated CD8<sup>+</sup> T cells were cultured in VIM ( $\pm$ PCS) for up to 24 h, and metabolite abundances in extracellular medium were measured at the indicated times (mean $\pm$ SEM, n=3/sample). Abundances for glucose, glutamine, and PCS (**C**), TCA cycle intermediates (**D**), and amino acids (**E**) are shown.

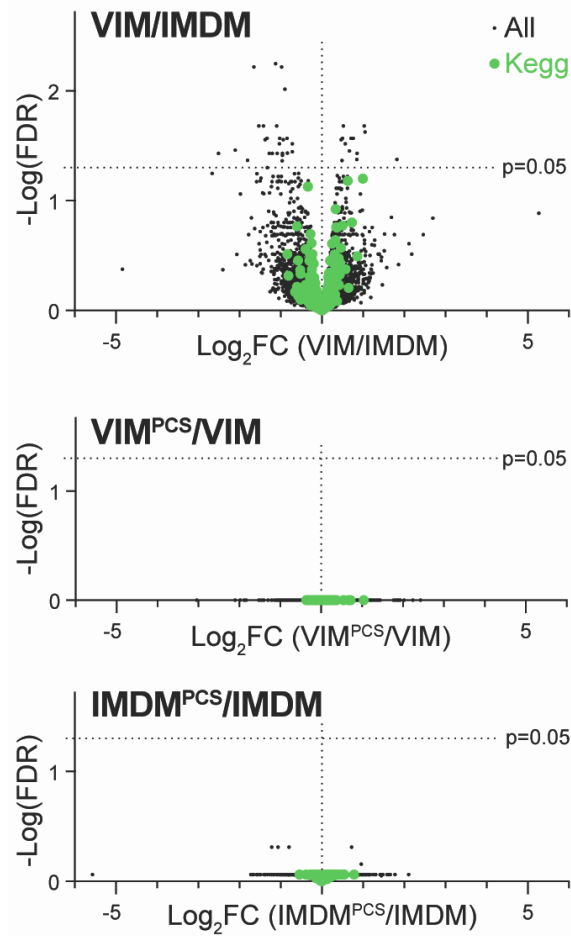

**Figure S2, Related to Figure 2. Impact of media formulations and PCS on CD8<sup>+</sup> T cell mRNA expression.**

Volcano plots comparing mRNA expression ( $\text{Log}_2\text{FC}$ ) versus statistical significance ( $-\text{Log}(\text{FDR})$ ) for CD8<sup>+</sup> T cells cultured in VIM versus IMDM (*top*), VIM containing PCS (VIM<sup>PCS</sup>) versus VIM (*middle*), or IMDM containing PCS (IMDM<sup>PCS</sup>) versus IMDM (*bottom*) for 24 h (corresponding to **Figure 1B**). All genes quantified by RNA sequencing are represented by the black dots, with KEGG metabolism genes highlighted in green. Statistical cutoff at  $p < 0.05$  is indicated by the dotted line.



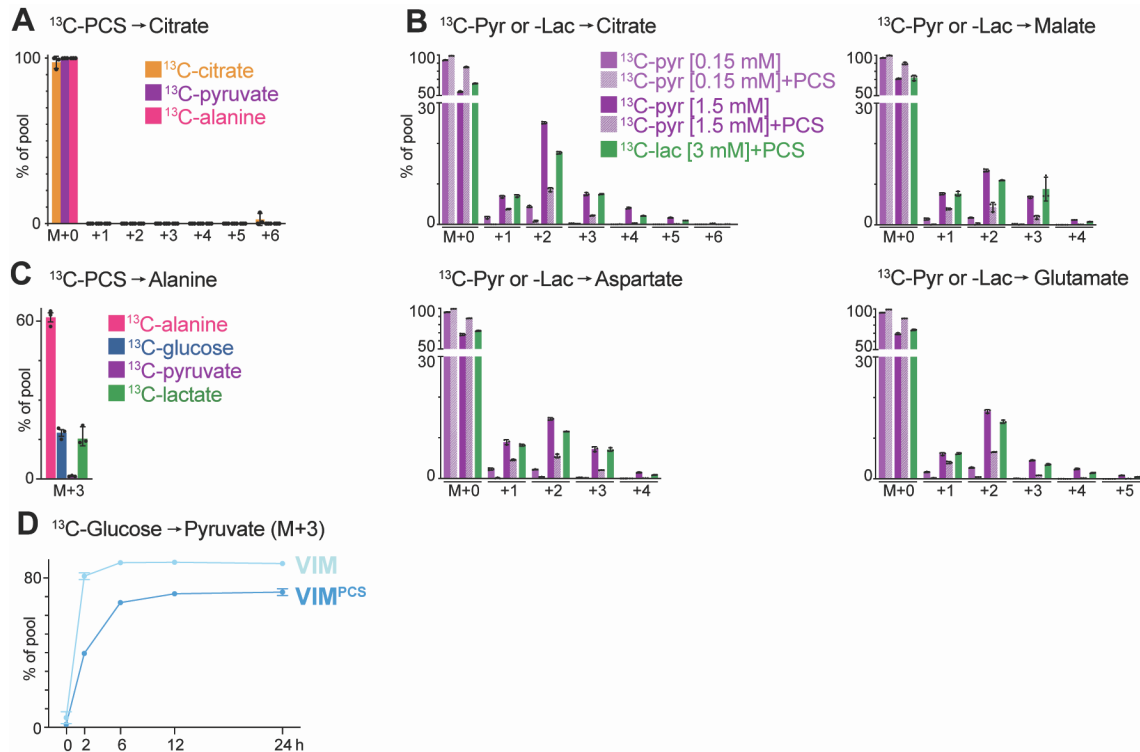

**Figure S3, Related to Figure 3. Contribution of extracellular citrate, pyruvate, and alanine to TCA cycle metabolism in CD8<sup>+</sup> T cells.**

**A**, Bar graph depicting mass isotopologue distributions (MIDs) for [U- $^{13}\text{C}$ ]-PCS-derived carbon into intracellular citrate for CD8<sup>+</sup> T cells cultured as in **Figure 3B**. Shown are individual isotopologues derived from [U- $^{13}\text{C}$ ]-citrate (orange), [U- $^{13}\text{C}$ ]-pyruvate (purple), or [U- $^{13}\text{C}$ ]-alanine (pink) after 24 h of culture (mean $\pm$ SEM, n=3/group). **B**, Bar graphs depicting MIDs for [U- $^{13}\text{C}$ ]-pyruvate- or [U- $^{13}\text{C}$ ]-lactate-derived intracellular citrate, malate, aspartate, or glutamate in CD8<sup>+</sup> T cells. CD8<sup>+</sup> T cells were stimulated for 3 days in standard IMDM using plate-bound anti-CD3 and -CD28 antibodies, after which activated CD8<sup>+</sup> T cells were cultured for 6 h in VIM containing physiological (0.15 mM) or high levels (1.5 mM) of [U- $^{13}\text{C}$ ]-pyruvate in the presence or absence of other PCS (acetate,  $\beta$ OHB, citrate, lactate) at their physiological concentrations (as in **Figure 1A**). Activated CD8<sup>+</sup> T cells were cultured in VIM plus PCS containing [U- $^{13}\text{C}$ ]-lactate as a

control (mean±SEM, n=3/group). **C**, Bar graph depicting MIDs for [U-<sup>13</sup>C]-PCS-derived carbon into intracellular alanine for CD8<sup>+</sup> T cells cultured as in **Figure 3B**. Shown are individual isotopologues derived from [U-<sup>13</sup>C]-alanine (pink), [U-<sup>13</sup>C]-glucose (blue), [U-<sup>13</sup>C]-pyruvate (purple), or [U-<sup>13</sup>C]-lactate (green) after 24 h of culture (mean±SEM, n=3/group). **D**, Line graph depicting fractional enrichment of intracellular <sup>13</sup>C-glucose-derived pyruvate M+3 in activated CD8<sup>+</sup> T cells over time. Activated CD8<sup>+</sup> T cells were cultured in VIM (±PCS) containing [U-<sup>13</sup>C]-glucose for up to 24 h, with intracellular metabolites extracted at the indicated time points (mean±SEM, n=3/sample).

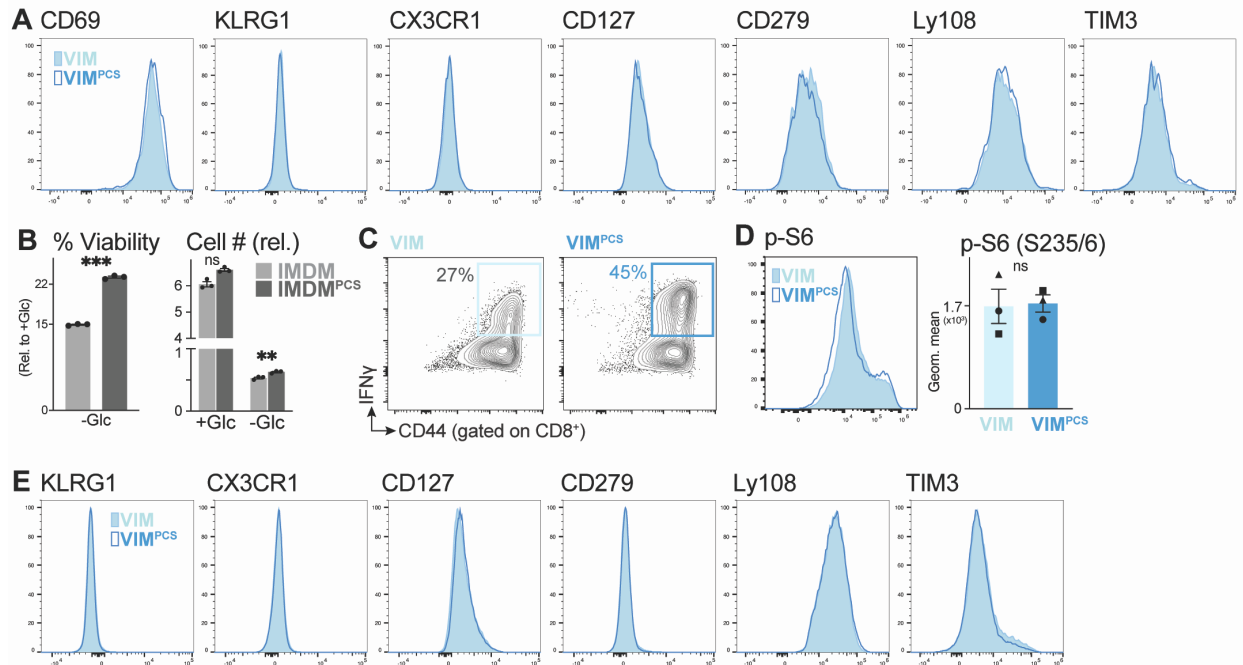

**Figure S4, Related to Figure 4. Physiologic carbon sources influence T cell survival and effector function.**

**A**, Representative histograms of cell surface marker expression (CD69, KLRG1, CX3CR1, CD127, CD279/PD-1, Ly108/Slamf6, and TIM3) in CD8<sup>+</sup> T cells activated for 3 days with plate-bound anti-CD3 and -CD28 antibodies in VIM (closed) or VIM containing PCS (open) as in **Figure 4A**. **B**, Bar graphs depicting cell viability (left) or cell number (right) of activated CD8<sup>+</sup> T cells after 48 h of culture in IMDM plus IL-2 and containing (+Glc) or lacking (-Glc) glucose. Percent viability was determined using viability dye staining and calculated relative to cell viability full glucose conditions (+Glc, 5 mM) (mean±SEM, n=3/group). Cell number was expressed relative to initial cell number at day 0 (mean±SEM, n=3/group). **C**, Representative flow cytometry plot of CD44 versus intracellular IFN- $\gamma$  expression for CD8<sup>+</sup> T cells activated with plate-bound anti-CD3- and anti-CD28 antibodies for 3 days in VIM or VIM plus PCS (n=3/group). The percentage of IFN- $\gamma$ <sup>+</sup> cells in each culture is shown. **D**, Histogram of intracellular

phospho-S6 (S235/236) protein expression in CD8<sup>+</sup> T cells activated for 3 days with plate-bound anti-CD3 and -CD28 antibodies in VIM (closed) or VIM containing PCS (open) as in **Figure S4A**. The MFI of p-S6 staining from biological replicates is shown (mean±SEM; n=3/group). **E**, Representative histograms of cell surface marker expression (KLRG1, CX3CR1, CD127, CD279/PD-1, Ly108/Slamf6, and TIM3) in CD8<sup>+</sup> T cells cultured for 7 days in VIM or VIM containing PCS as in **Figure 4G**. \*,  $p<0.05$ ; \*\*,  $p<0.01$ ; \*\*\*,  $p<0.001$ ; \*\*\*\*,  $p<0.0001$ ; **ns**, not significant.

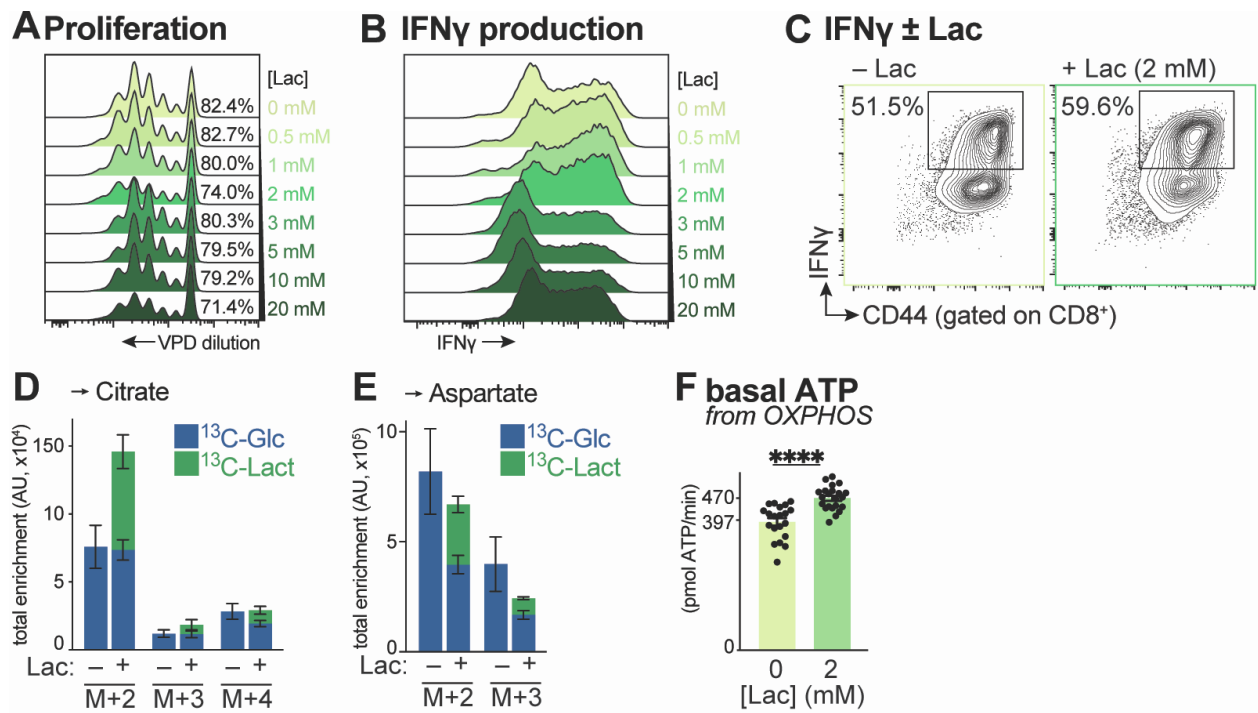

**Figure S5, Related to Figure 5. Impact of exogenous lactate on CD8<sup>+</sup> T cell proliferation, IFN- $\gamma$  production, and metabolism.**

**A**, Representative histograms depicting VPD dye dilution for CD8<sup>+</sup> T cells activated for 3 days with anti-CD3 and -CD28 antibodies in VIM containing the indicated concentrations of sodium lactate (0, 0.5, 1, 2, 3, 5, 10, 20 mM). The percentage of CD8<sup>+</sup> T cells that have undergone at least one cell division are indicated. **B**, Representative histograms depicting intracellular IFN- $\gamma$  levels in CD8<sup>+</sup> T cells activated as in **Figure S5A**. **C**, Representative flow cytometry plot of CD44 versus intracellular IFN- $\gamma$  expression for CD8<sup>+</sup> T cells cultured in VIM without (-) or containing (+) 2 mM lactate. CD8<sup>+</sup> T cells were activated as in **Figure S5A**. The percentage of IFN- $\gamma$ <sup>+</sup> cells in each culture is shown. **D–E**, Bar graphs corresponding to **Figure 5B–C** depicting total abundance of [U-<sup>13</sup>C]-glucose (blue) and [U-<sup>13</sup>C]-lactate (green) labeling into (**D**) citrate (M+2–4 isotopologues) or (**E**) aspartate (M+2–3 isotopologues) in activated CD8<sup>+</sup> T

cells cultured in VIM lacking (-) or containing (+) 2 mM lactate (mean±SEM, n=3/sample). **F**, Bar graph of basal OXPHOS ATP production rates for in vitro-activated CD8<sup>+</sup> T cells cultured with 0 or 2 mM lactate as in **Figure 5G** (mean±SD, n=20–22). \*,  $p<0.05$ ; \*\*,  $p<0.01$ ; \*\*\*,  $p<0.001$ ; \*\*\*\*,  $p<0.0001$ ; **ns**, not significant.

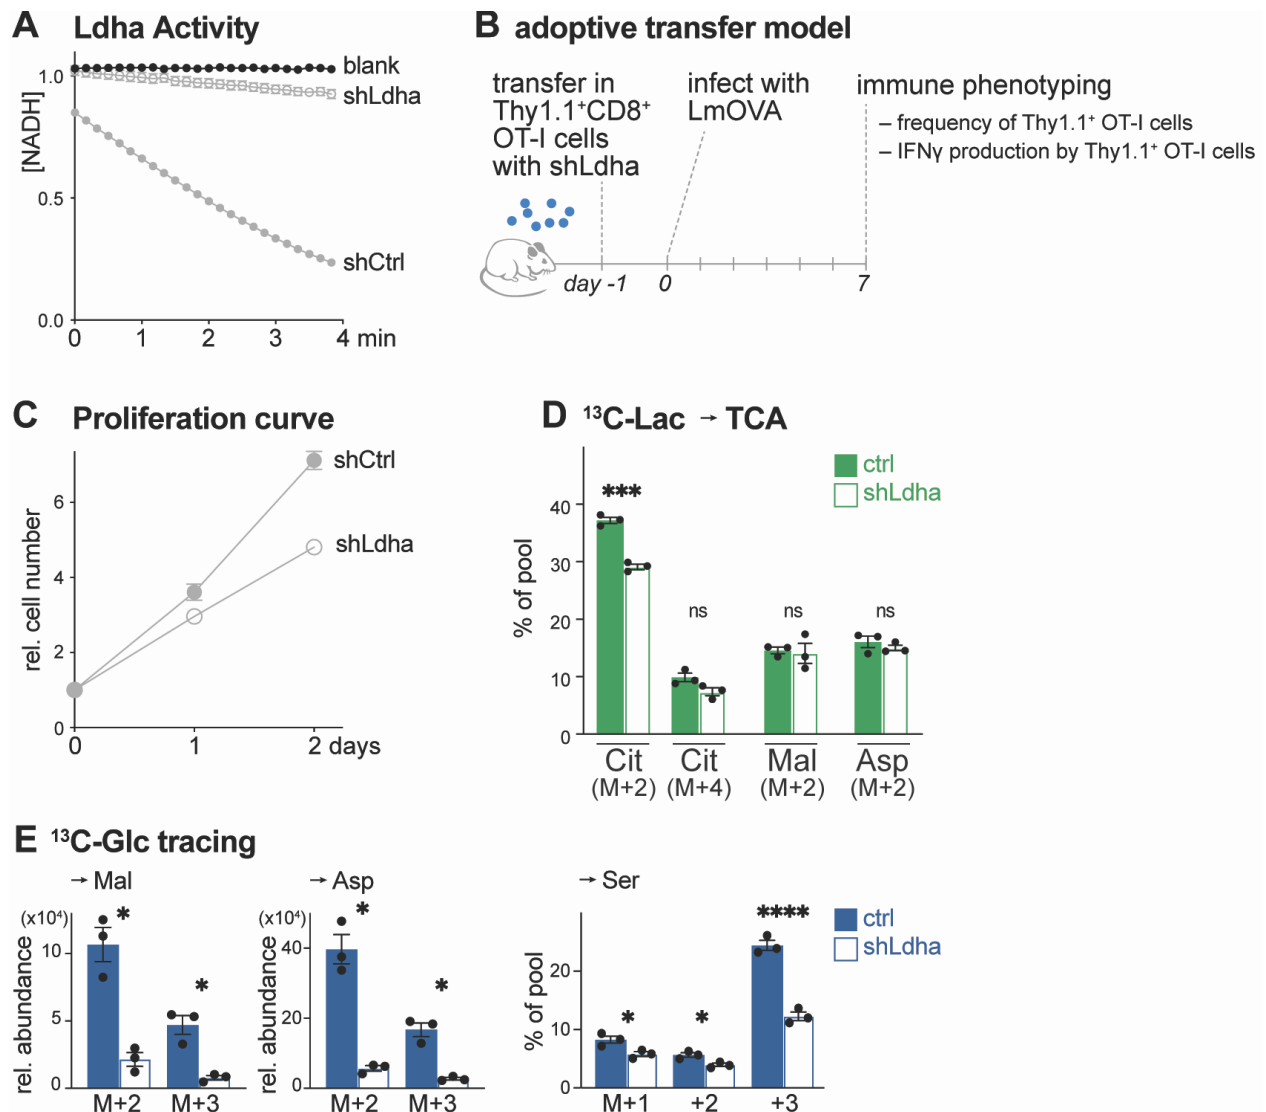

**Figure S6, Related to Figure 6. Validation of *Ldha* silencing in CD8<sup>+</sup> T cells.**

**A**, Line graph depicting Ldh activity (via Ldh-specific NADH consumption) in cellular extracts from CD8<sup>+</sup> T cells expressing control (shCtrl) or *Ldha*-targeting (sh*Ldha*) shRNAs. Blank samples containing no cellular extract were used to assess background NADH degradation. **B**, Graphic depicting adoptive transfer and *LmOVA* infection model used in **Figure 6E–F**. **C**, Line graph depicting proliferation of CD8<sup>+</sup> T cells expressing control (shCtrl) or *Ldha*-targeting (sh*Ldha*) shRNAs. CD8<sup>+</sup> T cells were activated for 3 days with anti-CD3 and -CD28 antibodies in IMDM medium, then biological replicates

re-cultured starting at day 0 in IMDM containing 10% dFBS (mean±SEM, n=3/sample).

**D**, Bar graphs depicting MID (% of pool) for intracellular citrate (Cit M+2 and M+4), malate (Mal M+2), and aspartate (Asp M+2) for activated control (Ctrl) or *shLdha*-expressing CD8<sup>+</sup> T cells cultured in VIM containing 2 mM [U-<sup>13</sup>C]-lactate and 5 mM unlabeled glucose for 4 h as in **Figure 6G** (mean±SEM, n=3/sample). **E**, Bar graphs depicting relative abundance of intracellular malate (Mal M+2–3) and aspartate (Asp M+2–3) and MID (% of pool) for serine (Ser M+1–3) for activated control (Ctrl) or *shLdha*-expressing CD8<sup>+</sup> T cells cultured in VIM containing 5 mM [U-<sup>13</sup>C]-glucose and 2 mM unlabeled lactate for 4 h as in **Figure 6H** (mean±SEM, n=3/sample). \*,  $p < 0.05$ ; \*\*,  $p < 0.01$ ; \*\*\*,  $p < 0.001$ ; \*\*\*\*,  $p < 0.0001$ ; **ns**, not significant.
